RESEARCH ARTICLE

# MicroRNA-33b Suppresses Migration and Invasion by Targeting c-Myc in Osteosarcoma Cells

Ning Xu, Zimu Li, Zhange Yu, Feng Yan, Yang Liu, Xiaofeng Lu, Weiliang Yang\*

Department of Orthopedic Surgery, The First Affiliated Hospital of Harbin Medical University, No. 23, Youzheng St, Nangang, Harbin, Heilongjiang, China

\*[yangpaper@yeah.net](mailto:yangpaper@yeah.net)

## Abstract

MicroRNAs have emerged as fundamental regulators in gene expression through silencing gene expression at the post-transcriptional and translational levels. Osteosarcoma is the most common type of primary malignant bone tumor and is characterized by complex genetic changes and resistance to conventional treatments. In our study, the role of miR-33b in the progression and metastasis of osteosarcoma was investigated. Our results showed that miR-33b was significantly downregulated in osteosarcoma tissue and cell lines. Overexpression of miR-33b significantly inhibited cell proliferation, migration, and invasion in the MG-63 osteosarcoma cell line. Moreover, we also showed that c-Myc was negatively regulated by miR-33b at the posttranscriptional level, via a specific target site within the 3'UTR. Overexpression of c-Myc impaired miR-33b-induced inhibition of proliferation and invasion in osteosarcoma cells. The expression of c-Myc was frequently downregulated in osteosarcoma tumors and cell lines and was inversely correlated with miR-33b expression. Thus, our findings suggest that miR-33b inhibits osteosarcoma cells migration and invasion by targeting the c-Myc gene, acting as tumor suppressor. The findings of this study contribute to current understanding of the functions of miR-33b in osteosarcoma.

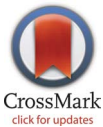

CrossMark  
click for updates

## OPEN ACCESS

**Citation:** Xu N, Li Z, Yu Z, Yan F, Liu Y, et al. (2014) MicroRNA-33b Suppresses Migration and Invasion by Targeting c-Myc in Osteosarcoma Cells. PLoS ONE 9(12): e115300. doi:10.1371/journal.pone.0115300

**Editor:** Jun Li, Sun Yat-sen University Medical School, China

**Received:** May 30, 2014

**Accepted:** November 21, 2014

**Published:** December 29, 2014

**Copyright:** © 2014 Xu et al. This is an open-access article distributed under the terms of the [Creative Commons Attribution License](https://creativecommons.org/licenses/by/4.0/), which permits unrestricted use, distribution, and reproduction in any medium, provided the original author and source are credited.

**Data Availability:** The authors confirm that all data underlying the findings are fully available without restriction. All relevant data are within the paper and its Supporting Information files.

**Funding:** The authors have no support or funding to report.

**Competing Interests:** The authors have declared that no competing interests exist.

## Introduction

Osteosarcomas are aggressive neoplasms of the bone, which mainly arises from the metaphysis of the long bones of adolescents and young adults [1]. Despite the recent advances in therapeutic strategies, such as wide tumor excision, adjuvant chemotherapy and radiotherapy, the prognosis of osteosarcoma patients remains

poor [2]. Increasing evidences have shown that osteosarcoma is closely related to abnormal genetic and epigenetic changes, which result in the abnormal expression of oncogenes or methylation of tumor suppressor genes [3]. Hence, it is essential to develop novel strategies for the early diagnosis, prediction of the prognosis, and the treatment for patients with osteosarcoma.

MicroRNAs (miRNAs) are short noncoding RNAs, usually 18–25 nucleotides in length, which repress translation and cleave mRNA by base pairing to the 3' untranslated region of the target genes [4]. It has been demonstrated that miRNAs play important roles in developmental biology, cellular differentiation programs and oncogenesis [5]. In particular, they regulate various cellular processes of tumor, including cell proliferation, differentiation, progression, apoptosis and invasion [6, 7]. Alterations in the miRNA expression have emerged as an important mechanism for the development and progression of cancers [8, 9]. Specific miRNAs that significantly affect the development and progression of human tumors have been identified in different cancers [10–12], indicating the role of miRNAs as potential therapeutic avenue for cancer treatment.

In the present study, we found that miR-33b was down-regulated in osteosarcoma cell lines and primary tumor samples. In osteosarcoma cell lines, miR-33b was able to inhibit cell proliferation, migration and invasion, suggesting that miR-33b might be a tumor suppressor. Moreover, the expression of c-Myc was frequently upregulated in osteosarcoma tumors and cell lines and was inversely correlated with miR-33b expression. Thus, our data suggest an important role of miR-33b in osteosarcoma pathogenesis and indicate its potential application in cancer therapy.

## Materials and Methods

### Ethics statement

All of these patients (patients' parents on behalf of the children) agreed to participate in the study and gave written informed consent. This study and the consent was approved by the ethical board of the institute of The First Affiliated Hospital of Harbin Medical University and complied with Declaration of the Helsinki.

### Tumor samples

Sixty primary osteosarcoma and their corresponding noncancerous bone tissues samples from the same specimens were collected from at the Department of orthopedic surgery, The First Affiliated Hospital of Harbin Medical University between 2007 and 2013. No patients had received blood transfusion, radiotherapy, or chemotherapy before surgery. Tissue samples were cut into two parts, one was fixed with 10% formalin for histopathological diagnosis, and the other was immediately snap-frozen in liquid nitrogen, and stored in liquid nitrogen until RNA extraction. These characteristics of tumor samples are described in [S1 Table](#).

### Cell lines and cell culture

Four osteosarcoma cell lines, including MG-63, U2OS, SOSP-9607, and SAOS-2, were obtained from the American Type Culture Collection (ATCC, Manassas, VA). Human osteoblast cell line hFOB was purchased from Promocell (Heidelberg, Germany). These osteosarcoma cell lines were propagated in Dulbecco's modified Eagle medium (Gibco; Invitrogen; Life Technologies, Germany), supplemented with 10% fetal bovine serum and streptomycin (100 µg/ml), penicillin (100 U/ml). hFOB cells were incubated in osteoblast growth medium (Promo Cell).

### Cell transfection

Cells were grown in the appointed medium 12–16 hours before transfection. The cells were transfected with 20 nmol/L of miR-33b mimics, inhibitor and the scramble mimics using lipofectamine 2000 (Invitrogen) according to the protocol of the manufacturer. The miRNA mimics, inhibitors, and the scramble mimics, which are non-homologous to the human genome were from GenePharma (Shanghai, China).

### RNA extraction and qRT-PCR analysis

Total RNA was extracted from cells or tissues with Trizol reagent (Invitrogen, Calsbad, CA, USA). cDNA synthesis was carried out from 1 µg of total RNA in 12 µl of final volume containing 1 µl stem-loop primer, 10 mM dNTP Mix (Invitrogen, USA). The mix was incubated at 65°C for 5 min, and then mixed with 5 × RT buffer, 0.1 M DTT, 200 U/µl MultiScribe reverse transcriptase and 40 U/µl RNase inhibitor (Invitrogen, USA). The mix was incubated at 37°C for 55 min, 70°C for 15 min and then was held at –20°C. Real-time PCR was performed using the standard TaqMan PCR protocol. These PCR reactions were included 1 µl of RT product, 1 µl of Universal TaqMan Master Mix and 1 µl of TaqMan probe/primer mix (Invitrogen, USA). All RT reactions including no-template controls were run in triplicate. All miRNA quantification data were normalized to U6, and mRNA quantification data were normalized to GAPDH. The relative amount of transcript was calculated using the comparative Ct method [13] (S2 Table).

### Cell proliferation assay

Cells were cultured in 96-well flat bottomed microplate and were incubated in 10% CCK-8 (Dojindo; Kumamoto, Japan) diluted in normal cultured medium and then were incubated for 1 h at 37°C. Proliferation rates were determined at 0, 24, 48 and 72 hours after transfection. Viable cells were counted by absorbance measurements at 450 nm using auto microplate reader (infinite M200, Tecan, Austria). The experiment was repeated three times.

### Cell migration and invasion assay

Invasion and migration assay were performed in triplicate using Transwell chambers coated with or without Matrigel membrane matrix (BD Biosciences, USA) as described in the manufacture's protocol. For the invasion assay, cells were seeds onto a Matrigel-coated membrane matrix present in the insert of a 24-well culture plate 24 hours after transfection. The cells that did not invade through the pores were carefully wiped out with cotton wool. Then cells located on the lower surface of the chamber were stained with 0.1% crystal violet (Sigma) and counted. These experiments were repeated three times.

### Luciferase reporter assay

The wild-type and mutant 3'UTR fragments were cloned into the downstream of the luciferase reporter gene in pGL3-control vector [14]. These cells were co-transfected with 0.4  $\mu$ g of the reporter construct, 0.2  $\mu$ g of pGL-3 control vector, and miR-33b or negative controls. Cells were harvested 24 h post-transfection and assayed with Dual Luciferase Assay (Promega, WI, USA) according to manufacturer's instructions. Firefly luciferase values were normalized to Renilla, and the ratio of Firefly/Renilla values was reported. All transfection assays were carried out in triplicate.

### Western blotting analysis

Proteins were separated on 10% SDS-PAGE gel, and then transferred to a PVDF membrane (Amersham, Buckinghamshire, UK). After blocked with 5% non-fat dried milk, the membrane was incubated with anti-c-Myc antibody (Abcam, England) at 1:1000 dilution; anti-GAPDH antibody (Proteintech, Chicago, USA) at 1:50,000 dilution. After washing with TBST (10 mM Tris, pH 8.0, 150 mM NaCl, and 0.1% Tween20), the membranes were incubated for 2 h with goat anti-rabbit antibody (zsgb-bio, Beijing, China) at 1:5000 dilution and 1:50000 dilution. Proteins bands were visualized using ECL reagents (Pierce, Rockford, IL, USA).

### Rescue assays of c-Myc gene expression

The full-length c-Myc ORF was PCR amplified and cloned into pcDNA3.1 to generate the pcDNA-c-Myc constructs, which were used in the rescue assays. MG-63 cells in 6-well plates were first transfected with miR-33b or scrambled dsRNAs (20 nM). After 24 h in culture, these cells were then co-transfected with either miR-33b or pcDNA-c-Myc constructs or pcDNA-empty vectors.

### Statistical analysis

Data were presented as the means  $\pm$  standard deviation of at least three experiments. Statistical analysis was performed using SPSS 15.0. A one-way analysis of variance (ANOVA) test, least significant difference (LSD) test, Chi-square test and Student's t test were used for statistical analysis.

## Results

### Expression of miR-33b was down regulated in osteosarcoma tissues and cell lines

We compare the expression of miR-33b in human osteosarcoma and adjacent normal bone tissues by qRT-PCR. As shown in [Fig. 1A](#), expression of miR-33b was much lower in four osteosarcoma cell lines than that in human osteoblast cell line hFOB. We also found that miR-33b expression was downregulated in 77.7% (46 out of 60) of osteosarcoma tissues compared with the corresponding adjacent normal bone tissues ([Fig. 1B](#)). In general, the expression of miR-33b in osteosarcoma tissues was significant lower than in the corresponding adjacent normal bone tissues ([Fig. 1C](#)). Moreover, the level of miR-33b expression was associated with metastasis (pM) stage of osteosarcoma patients ([Fig. 1D](#)).

### Overexpression of miR-33b inhibited osteosarcoma cell proliferation, migration and invasion

We transfected the MG-63 cells with miR-33b mimics, inhibitors or negative control and then evaluated proliferation, invasion and migration ability of MG-63 cells. Transfection of miR-33b mimics into the MG-63 cells resulted in an increase in miR-33b expression compared with negative control or transfection ([Fig. 2A](#)). CCK-8 proliferation assays showed that the cell growth rate was reduced in the miR-33b mimic-transfected MG-63 cells compared with either the scrambled miRNA-transfected cells or the untreated cells ([Fig. 2B](#)). In contrast, the miR-33b inhibitor significantly accelerated the cell proliferation of the MG-63 cells. The cells that were treated with the miR-33b mimic were distinctively less migratory than the scrambled control or untreated cells ([Fig. 2C](#)). In contrast, the miR-33b inhibitor significantly accelerated the cell migration of the MG-63 cells. Furthermore, we conducted cell invasion Matrigel assays and then stained the invaded cells to measure the directional invasion ability of the cells after ectopically expressing miR-33b in MG-63 cells. The invasiveness of the cells that were transfected with the miR-33b mimic were dramatically decreased compared with the scrambled control and untreated cells. However, the miR-33b inhibitor significantly increased the invasiveness of the MG-63 cells ([Fig. 2D](#)).

### C-Myc was a direct target of miR-33b in osteosarcoma cells

As predicted by PicTar, there were complementarity between hsa-miR-33b and the c-Myc 3'-UTR ([Fig. 3A](#)). Overexpression of miR-33b reduced both the protein and the mRNA levels of c-Myc in osteosarcoma cells ([Fig. 3C and D](#)). The effects of miR-33b on the translation of c-Myc mRNA into protein was then evaluated by a luciferase reporter assay ([Fig. 3B](#)). Overexpression of miR-33b remarkably reduced the luciferase activity of the reporter gene with the wild-type construct but not with the mutant c-Myc 3'-UTR construct, indicating that miR-33b directly targeted the c-Myc 3'-UTR.

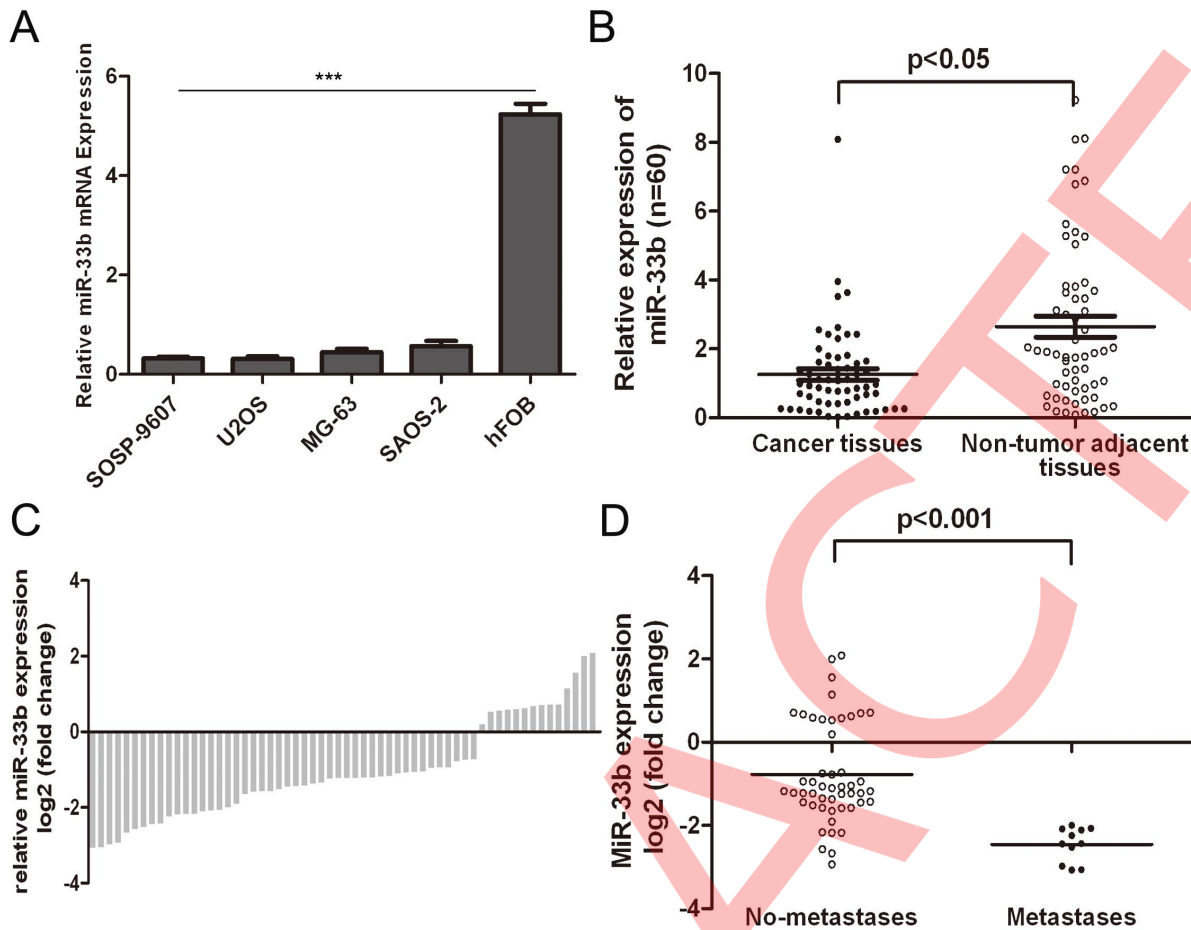

**Fig. 1. miR-33b is downregulated in osteosarcoma.** (A) The expression relative expression levels were determined by qRT-PCR in human osteoblast cell line (hFOB) and osteosarcoma cells (SOSP-9607, U2OS, MG-63, SAOS-2). (B) qRT-PCR analysis of miR-33b expression in 60 pairs osteosarcoma tissues and their corresponding adjacent normal bone tissues. The expression of miR-33b was normalized to U6 snRNA. (C) Relative miR-33b expression levels in osteosarcoma tissues and their corresponding adjacent normal bone tissues. (D) Association between miRNA level between pM stage (No metastasis and Metastasis). Student's *t* test was used to analyze the significant differences between the tumor and normal tissues. Correlation of miR-33b expression with patients' clinicopathological variables was evaluated by one-way analysis of variance test. \*\*\* $p < 0.001$ .

doi:10.1371/journal.pone.0115300.g001

### Overexpression of c-Myc impaired the miR-33b-induced inhibition of proliferation and invasion in osteosarcoma cells

We performed rescue experiments to further validate whether c-Myc was involved in the anti-tumor properties of miR-33b in osteosarcoma cells. The c-Myc expression vector pcDNA 3.1-c-Myc was used to restore c-Myc expression. The protein level of c-Myc was reduced when miR-33b mimics were transfected with pcDNA-c-Myc after 24 h (Fig. 4A). As expected, the ectopic expression of c-Myc induced marked increases in cell proliferation and migration (Fig. 4B and C; see group pcDNA-c-Myc+Scramble and group pcDNA+Scramble). Overexpression of miR-33b can decrease the c-Myc-induced the proliferation and invasion of osteosarcoma cells. Thus, we concluded that the repression of cell growth by miR-33b was a consequence of decreased c-Myc expression in the MG-63 cells.

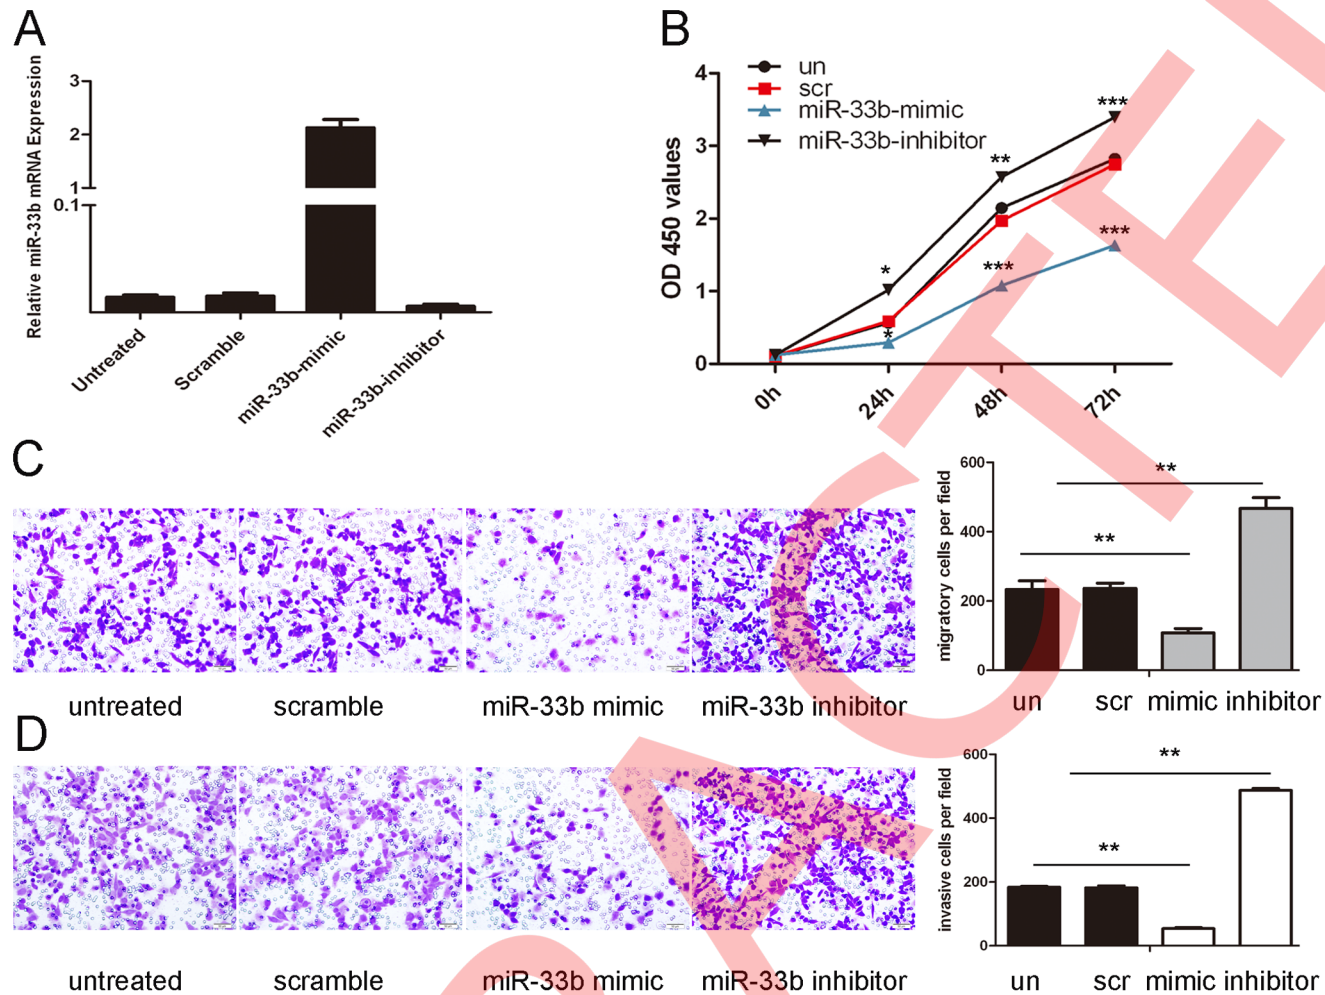

**Fig. 2. Overexpression of miR-33b inhibits proliferation, migration and invasion of osteosarcoma cells.** (A) qRT-PCR analysis of miR-33b expression after the transfection of miR-33b mimics, inhibitors or scramble or untreated. (B) The CCK8 assay used to evaluate the proliferation of MG-63 cells after transfection with the miR-33b mimics, inhibitors or scramble or untreated. (C) Migration assays of MG-63 cells after treatment with miRNA mimics, inhibitors or scramble or no transfection; the relative ratio of migrative cells per field is shown. (D) Invasion analysis of MG-63 cells after treatment with miRNA mimics, inhibitors or scramble or no untreated; the relative ratio of invasive cells per field is shown below, least significant difference (LSD) test was used to analyze the significant differences. \* $p < 0.05$ , \*\*  $p < 0.01$ , and \*\*\* $p < 0.001$ .

doi:10.1371/journal.pone.0115300.g002

### MiR-33b was negatively regulated c-Myc gene expression

As shown in [Fig. 5A and 5B](#), the expression levels of c-Myc mRNA and protein were much higher in four osteosarcoma cell lines than that in one human osteoblast cell line hFOB. In addition, the expression of c-Myc in osteosarcoma tissues was also significant higher than in the corresponding adjacent normal bone tissues ([Fig. 5C](#)). As shown in [Fig. 5D](#), when the c-Myc levels were plotted against miR-33b expression, a significant inverse correlation was obtained (two-tailed Pearson's correlation analysis,  $r = -0.851$ ;  $p < 0.01$ ).

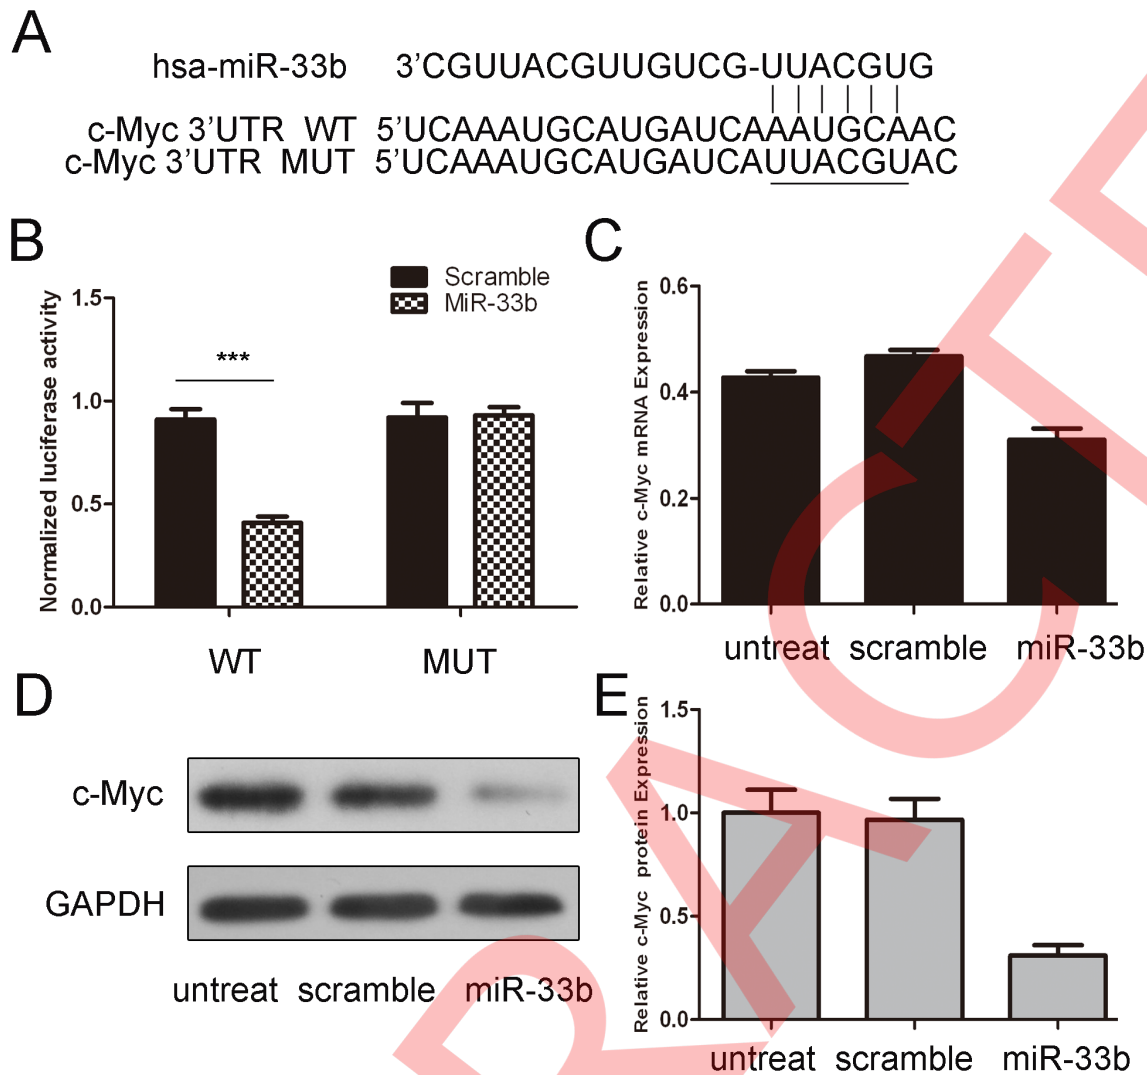

**Fig. 3. miR-33b targets c-Myc in osteosarcoma cells.** (A) The sequences of miR-33b binding sites within the human c-Myc 3'UTRs and schematic reporter constructs, in this panel, c-Myc-WT represent the reporter constructs containing the entire 3'UTR sequences of c-Myc. C-Myc-MUT represent the reporter constructs containing mutated nucleotides. (B) The analysis of the relative luciferase activities of c-Myc-WT, c-Myc-MUT in 293T cells. The error bars are derived from triplicate experiments. (C) qRT-PCR analysis of c-Myc mRNA expression in MG-63 cells after treatment with miRNA mimics or scramble or untreated. The expression of c-Myc was normalized to GAPDH. (D) Western blot analysis of c-Myc expression in MG-63 cells transfected with miR-33b mimics or scramble or untreated. GAPDH was also detected as a loading control. (E) The ratio signal of c-Myc to GAPDH in each lane was determined. Student's *t* test was used to analyze the significant differences. \*\*\**p*<0.001.

doi:10.1371/journal.pone.0115300.g003

## Discussion

Recent studies have revealed that miRNAs are involved in the development and progression of various tumors through regulating the expression of multiple target genes [15–17]. Here, we investigated the role of miR-33b in osteosarcoma. Our results showed that miR-33b expression was down-regulated in osteosarcoma cells and tissues compared to paired adjacent non-tumor bone tissues. Statistical analysis revealed that the lower expression level of miR-33b positively correlated



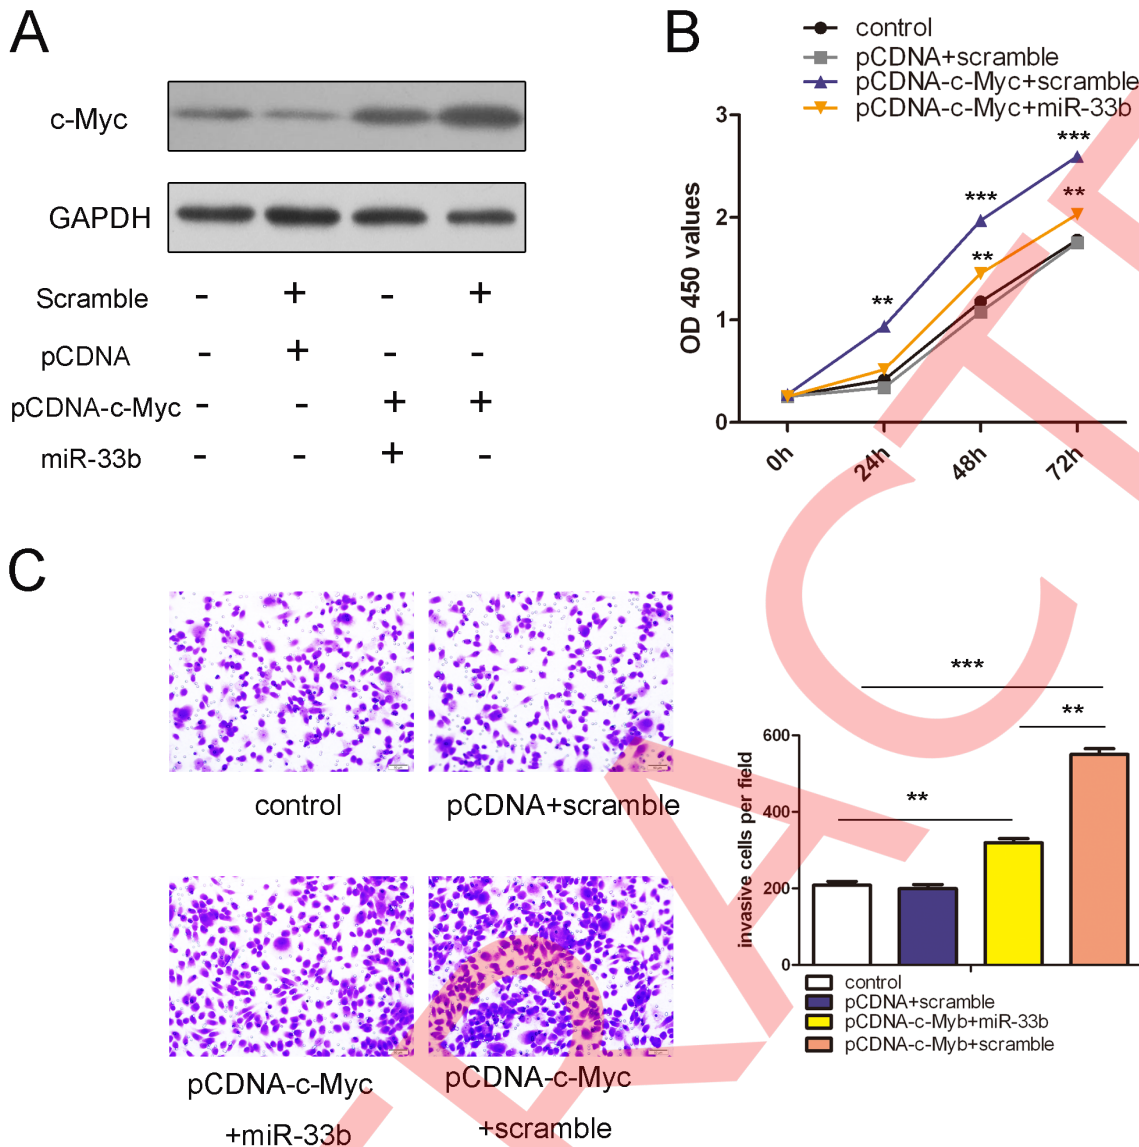

**Fig. 4. Overexpression of c-Myc impairs miR-33b-induced inhibition of proliferation and invasion in osteosarcoma cells.** (A) Western blot analysis of c-Myc protein expression in MG-63 cells co-transfected with either a miR-33b mimics or scramble and pCDNA-c-Myc or pCDNA empty vector; GAPDH was also detected as a loading control. (B) The CCK8 assay used to evaluate the proliferation of MG-63 cells transfected with different combinations. (C) Invasion assay of MG-63 cells treated with different combinations. The ratio of invasive cells per field is shown right. LSD test was used to analyze the significant differences. \* $p < 0.05$ , \*\*  $p < 0.01$ , \*\*\* $p < 0.001$ .

doi:10.1371/journal.pone.0115300.g004

with metastasis. Moreover, in vitro experiments proved that over-expression of miR-33b inhibited proliferation, migration and invasion in the osteosarcoma cells. Furthermore, c-Myc was identified as a novel direct target gene of miR-33b. Our findings suggested that miR-33b has a tumor suppressive effect in osteosarcoma by inhibiting cell proliferation and invasion.

Increasing evidences have shown a critical role of miR-33b in cancer progression [18, 19]. For example, Salinas et al. reported that overexpression of

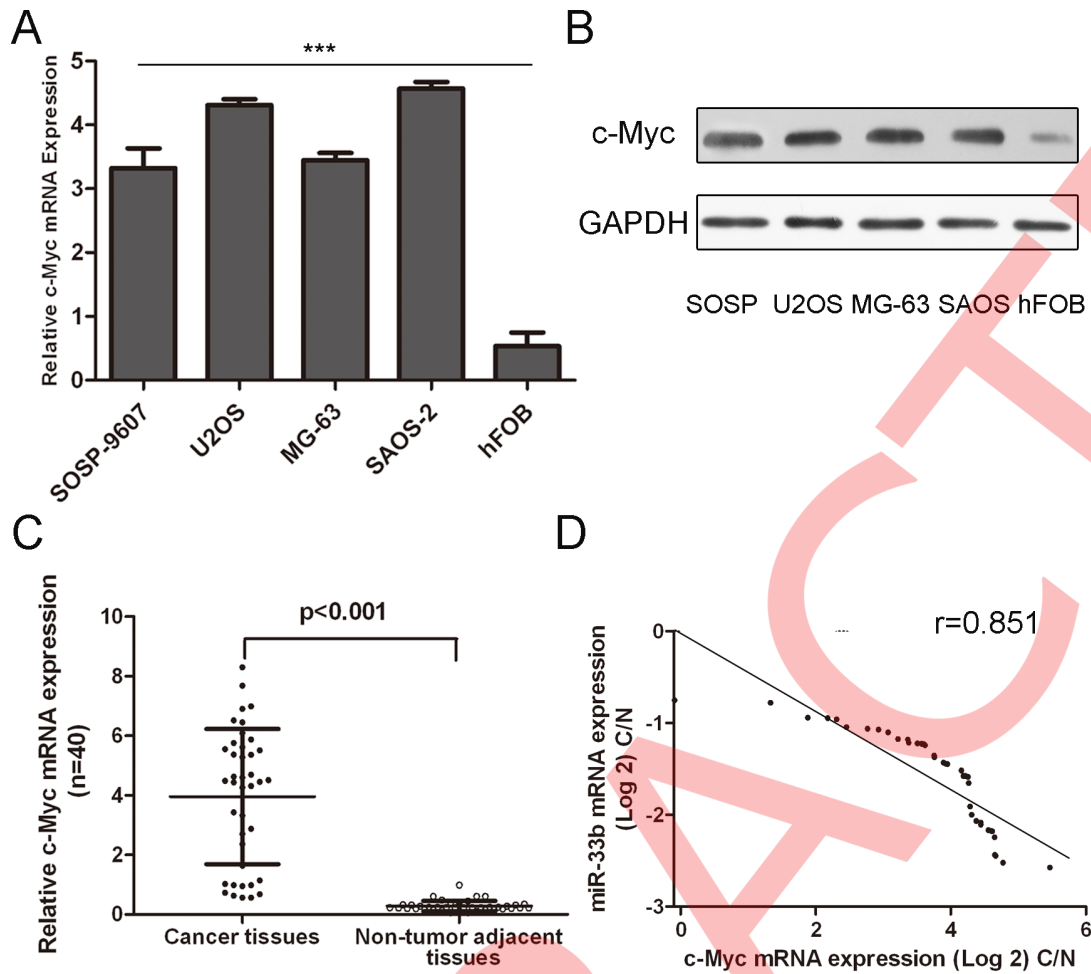

**Fig. 5. miR-33b negatively regulates c-Myc gene expression.** (A) The relative mRNA of c-Myc expression levels were determined by qRT-PCR in human osteoblast cell line (hFOB) and osteosarcoma cells (SOSP-9607, U2OS, MG-63, SAOS-2). (B) Western blot analysis of c-Myc expression in human osteoblast cell line (hFOB) and osteosarcoma cells (SOSP-9607, U2OS, MG-63, SAOS-2). (C) qRT-PCR analysis of c-Myc expression in 40 pairs osteosarcoma tissues and their corresponding adjacent normal bone tissues. The expression of c-Myc was normalized to GAPDH. The expression of c-Myc in osteosarcoma tissues was significant higher than in the corresponding adjacent normal bone tissues. (D) Analysis of correlation of miR-33b and c-Myc expression in osteosarcoma tissues. Student's *t* test was used to analyze the significant differences between the osteosarcoma cells and osteoblast cell line. \*\*\* $p < 0.001$ .

doi:10.1371/journal.pone.0115300.g005

miR-33b inhibited the expression of the cyclin-dependent kinase 6 (CDK6) and cyclin D1, by reducing cell proliferation and cell cycle progression [18]. Merchan et al. has shown that miR-33 is significantly downregulated in the super-p53 mice hematopoietic stem cells (HSCs) compared to in the wild-type mice HSCs but highly expressed in more-differentiated progenitor subpopulations [20]. However, the expression and function of miR-33b in osteosarcoma has not been reported. In our study, we found that the expression of miR-33b was down-regulated in 60 human osteosarcoma tissues compared to paired non-cancerous adjacent tissues. All of these evidences indicated that miR-33b might play a significant part in the development of osteosarcoma.

To determine the biological relevance of miR-33b in osteosarcoma, we performed functional assays. Ectopic expression of miR-33b significantly inhibited osteosarcoma cell proliferation, migration and invasion. These findings suggested that miR-33b might act as a tumor suppressor gene whose down-regulation may contribute to the progression and metastasis of osteosarcoma.

Further investigation was conducted to explore the molecular mechanism by which miR-33b suppressed osteosarcoma cell growth, migration and invasion. We identified c-Myc as a direct target of miR-33b in the MG-63 cells. Complementary sequence of miR-33b was identified in the 3'UTR of c-Myc mRNA. We demonstrated that miR-33b directly targeted the 3'UTR of c-Myc, as its overexpression was associated with suppression of luciferase activity. In addition, a significant down-regulation in the level of c-Myc protein was observed after miR-33b over-expression. These results indicated that miR-33b might function as a tumor suppressor partly mediated by repressing c-Myc expression in osteosarcoma.

C-Myc is one of the best-studied oncogenes frequently overexpressed in many human tumours [21–23]. C-Myc was initially identified as a retroviral oncogene in avian tumors and subsequent research has shown that as a nuclear transcription factor. C-Myc regulates hundreds of target genes involved in cell growth and proliferation, differentiation, apoptosis, metabolism, angiogenesis and DNA repair [24, 25]. Moreover, overexpression of c-Myc was considered to be a predictor of poor prognosis for clinical patients in several types of cancer such as gastric cancer, bladder cancer and breast cancer [26–31]. Furthermore, previous studies have showed that c-Myc mRNA expression was increased in osteosarcoma compared to adjacent pair-matched non-tumor tissues [32, 33]. However, the underlying mechanisms are still unclear. The ability of miR-33b to target c-Myc in our study may provide one potential mechanism of post-transcriptional control of c-Myc.

In conclusion, our study reveals that miR-33b functions as a tumor suppressor miRNA by inhibiting cancer cell proliferation, migration, and invasion through downregulating c-Myc expression in human osteosarcoma. Therefore, miR-33b may be a potential target for the development of novel anticancer therapies in osteosarcoma.

## Supporting Information

**S1 Table.** Clinicopathologic characteristics of patients with osteosarcoma.  
[doi:10.1371/journal.pone.0115300.s001](https://doi.org/10.1371/journal.pone.0115300.s001) (DOCX)

**S2 Table.** Primer sequence.  
[doi:10.1371/journal.pone.0115300.s002](https://doi.org/10.1371/journal.pone.0115300.s002) (DOCX)

## Author Contributions

Conceived and designed the experiments: NX ZML ZGY FY YL XFL WLY. Performed the experiments: NX ZML ZGY FY YL XFL WLY. Analyzed the data: NX ZML ZGY FY YL XFL WLY. Contributed reagents/materials/analysis tools: NX ZML ZGY FY YL XFL WLY. Wrote the paper: NX ZML ZGY FY YL XFL WLY.

## References

1. Hughes DP (2009) How the NOTCH pathway contributes to the ability of osteosarcoma cells to metastasize. *Cancer Treat Res* 152: 479–496.
2. Yang J, Zhang W (2013) New molecular insights into osteosarcoma targeted therapy. *Curr Opin Oncol* 25: 398–406.
3. Rainusso N, Wang LL, Yustein JT (2013) The adolescent and young adult with cancer: state of the art – bone tumors. *Curr Oncol Rep* 15: 296–307.
4. Hummel R, Hussey DJ, Haier J (2010) MicroRNAs: predictors and modifiers of chemo- and radiotherapy in different tumour types. *Eur J Cancer* 46: 298–311.
5. Kim YK, Yu J, Han TS, Park SY, Namkoong B, et al. (2009) Functional links between clustered microRNAs: suppression of cell-cycle inhibitors by microRNA clusters in gastric cancer. *Nucleic Acids Res* 37: 1672–1681.
6. Yan K, Gao J, Yang T, Ma Q, Qiu X, et al. (2012) MicroRNA-34a inhibits the proliferation and metastasis of osteosarcoma cells both in vitro and in vivo. *PLoS One* 7: e33778.
7. Song L, Yang J, Duan P, Xu J, Luo X, et al. (2013) MicroRNA-24 inhibits osteosarcoma cell proliferation both in vitro and in vivo by targeting LPAATbeta. *Arch Biochem Biophys* 535: 128–135.
8. Liang W, Gao B, Fu P, Xu S, Qian Y, et al. (2013) The miRNAs in the pathogenesis of osteosarcoma. *Front Biosci (Landmark Ed)* 18: 788–794.
9. Wu WK, Lee CW, Cho CH, Fan D, Wu K, et al. (2010) MicroRNA dysregulation in gastric cancer: a new player enters the game. *Oncogene* 29: 5761–5771.
10. Li X, Zhang Y, Shi Y, Dong G, Liang J, et al. (2011) MicroRNA-107, an oncogene microRNA that regulates tumour invasion and metastasis by targeting DICER1 in gastric cancer. *J Cell Mol Med* 15: 1887–1895.
11. Li CL, Nie H, Wang M, Su LP, Li JF, et al. (2012) microRNA-155 is downregulated in gastric cancer cells and involved in cell metastasis. *Oncol Rep* 27: 1960–1966.
12. Kurashige J, Kamohara H, Watanabe M, Hiyoshi Y, Iwatsuki M, et al. (2012) MicroRNA-200b regulates cell proliferation, invasion, and migration by directly targeting ZEB2 in gastric carcinoma. *Ann Surg Oncol* 19 Suppl 3: S656–664.
13. Livak KJ, Schmittgen TD (2001) Analysis of relative gene expression data using real-time quantitative PCR and the 2(-Delta Delta C(T)) Method. *Methods* 25: 402–408.
14. Gong J, Li J, Wang Y, Liu C, Jia H, et al. (2014) Characterization of microRNA-29 family expression and investigation of their mechanistic roles in gastric cancer. *Carcinogenesis* 35: 497–506.
15. Kang W, Tong JH, Chan AW, Lung RW, Chau SL, et al. (2012) Stathmin1 plays oncogenic role and is a target of microRNA-223 in gastric cancer. *PLoS One* 7: e33919.
16. Zhou X, Wei M, Wang W (2013) MicroRNA-340 suppresses osteosarcoma tumor growth and metastasis by directly targeting ROCK1. *Biochem Biophys Res Commun* 437: 653–658.
17. Osaki M, Takeshita F, Sugimoto Y, Kosaka N, Yamamoto Y, et al. (2011) MicroRNA-143 regulates human osteosarcoma metastasis by regulating matrix metalloprotease-13 expression. *Mol Ther* 19: 1123–1130.
18. Cirera-Salinas D, Pauta M, Allen RM, Salerno AG, Ramirez CM, et al. (2012) Mir-33 regulates cell proliferation and cell cycle progression. *Cell Cycle* 11: 922–933.

19. **Taniguchi M, Nakajima I, Chikuni K, Kojima M, Awata T, et al.** (2014) MicroRNA-33b downregulates the differentiation and development of porcine preadipocytes. *Mol Biol Rep* 41: 1081–1090.
20. **Herrera-Merchan A, Cerrato C, Luengo G, Dominguez O, Piris MA, et al.** (2010) miR-33-mediated downregulation of p53 controls hematopoietic stem cell self-renewal. *Cell Cycle* 9: 3277–3285.
21. **Spender LC, Inman GJ** (2014) Developments in Burkitt's lymphoma: novel cooperations in oncogenic MYC signaling. *Cancer Manag Res* 6: 27–38.
22. **Benetatos L, Vartholomatos G, Hatzimichael E** (2014) Polycomb group proteins and MYC: the cancer connection. *Cell Mol Life Sci* 71: 257–269.
23. **Boxer LM, Dang CV** (2001) Translocations involving c-myc and c-myc function. *Oncogene* 20: 5595–5610.
24. **Hayward WS, Neel BG, Astrin SM** (1981) Activation of a cellular onc gene by promoter insertion in ALV-induced lymphoid leukosis. *Nature* 290: 475–480.
25. **Lin CY, Loven J, Rahi PB, Paranal RM, Burge CB, et al.** (2012) Transcriptional amplification in tumor cells with elevated c-Myc. *Cell* 151: 56–67.
26. **Han S, Kim HY, Park K, Cho HJ, Lee MS, et al.** (1999) c-Myc expression is related with cell proliferation and associated with poor clinical outcome in human gastric cancer. *J Korean Med Sci* 14: 526–530.
27. **Shibuta K, Mori M, Mimori K, Inoue H, Nakashima H, et al.** (1996) Expression of prothymosin-alpha and c-myc mRNA in human gastric cancer. *Int J Oncol* 9: 247–251.
28. **Schmitz-Drager BJ, Schulz WA, Jurgens B, Gerharz CD, van Roeyen CR, et al.** (1997) c-myc in bladder cancer. Clinical findings and analysis of mechanism. *Urol Res* 25 Suppl 1: S45–49.
29. **Seo HK, Ahn KO, Jung NR, Shin JS, Park WS, et al.** (2014) Antitumor activity of the c-Myc inhibitor KSI-3716 in gemcitabine-resistant bladder cancer. *Oncotarget*.
30. **Planas-Silva MD, Bruggeman RD, Grenko RT, Smith JS** (2007) Overexpression of c-Myc and Bcl-2 during progression and distant metastasis of hormone-treated breast cancer. *Exp Mol Pathol* 82: 85–90.
31. **Campone M, Noel B, Couriaud C, Grau M, Guillemin Y, et al.** (2011) c-Myc dependent expression of pro-apoptotic Bim renders HER2-overexpressing breast cancer cells dependent on anti-apoptotic Mcl-1. *Mol Cancer* 10: 110.
32. **Gamberi G, Benassi MS, Bohling T, Ragazzini P, Molendini L, et al.** (1998) C-myc and c-fos in human osteosarcoma: prognostic value of mRNA and protein expression. *Oncology* 55: 556–563.
33. **Wu X, Cai ZD, Lou LM, Zhu YB** (2012) Expressions of p53, c-MYC, BCL-2 and apoptotic index in human osteosarcoma and their correlations with prognosis of patients. *Cancer Epidemiol* 36: 212–216.
